# Supplementary material
Source: MDPI journal article supplement (https://www.mdpi.com/2072-4292/7/12/15830)
Supplement: s1 [file s1]

Support Information: Estimation of Alpine Forest Structural Variables from Imaging Spectrometer Data. *Remote Sens*. 2015, *7*, pp–pp.

Parviz Fatehi *, Alexander Damm, Michael E. Schaepman and Mathias Kneubühler


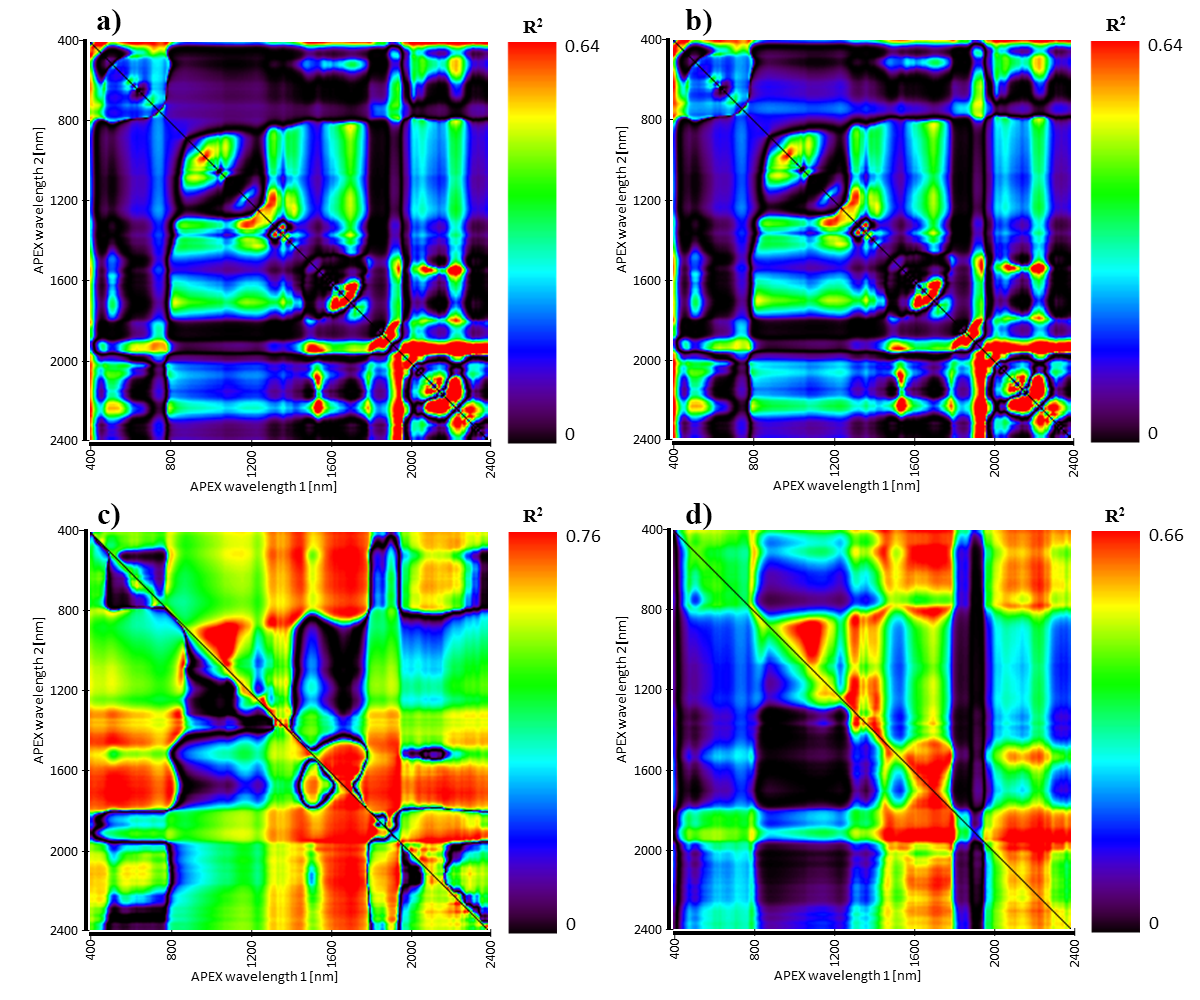


**Figure S1.** Correlograms showing the coefficients of determination (R2) between VIs for all two-band combinations and forest canopy cover. (**a**) simple ratio (SR) type; (**b**) NDVI type ; (**c**) PVI type; (**d**) SAVI2 type.

Table S1. Best narrow-band VIs derived from 2D correlograms to estimate canopy cover.

| Vegetation index | ρ1(nm) | ρ2(nm) | R2 |
| --- | --- | --- | --- |
| SR Type | 2326 | 1993 | 0.58 |
| 2404 | 1993 | 0.61 |
| 2267 | 1993 | 0.51 |
| 2253 | 2204 | 0.62 |
| 2204 | 2253 | 0.61 |
| NDVI Type | 2204 | 2253 | 0.61 |
| 1993 | 2273 | 0.51 |
| 1993 | 2326 | 0.54 |
| 1993 | 2391 | 0.53 |
| PVI Type | 1716 | 553 | 0.54 |
| 1707 | 586 | 0.53 |
| **883** | **763** | **0.76** |
| 1654 | 1545 | 0.52 |
| 1724 | 1554 | 0.55 |
| 1698 | 1654 | 0.62 |
| 569 | 1689 | 0.53 |
| 1698 | 1776 | 0.52 |
| 2162 | 1993 | 0.56 |
| 1636 | 1993 | 0.52 |
| 1716 | 2155 | 0.52 |
| 1716 | 2232 | 0.52 |
| SAVI2 Type | 895 | 754 | 0.65 |
| 2162 | 1993 | 0.55 |
| 2239 | 1993 | 0.55 |
| 2287 | 1993 | 0.57 |
| 2385 | 1993 | 0.61 |

**Table S2.** Bootstrap results for the best simple and the best stepwise multiple regression model to estimate canopy closure.

| **Feature** | **Bootstrap R2** | | **Bootstrap RMSE (%)** | | **Bootstrap rRMSE (%)** | |
| --- | --- | --- | --- | --- | --- | --- |
| **Mean** | **SD** | **Mean** | **SD** | **Mean** | **SD** |
| **Simple Regression** | 0.60 | 0.14 | 9.26 | 1.35 | 14.90 | 2.38 |
| **Multiple Regression** | 0.82 | 0.07 | 6.22 | 0.78 | 10.01 | 1.34 |


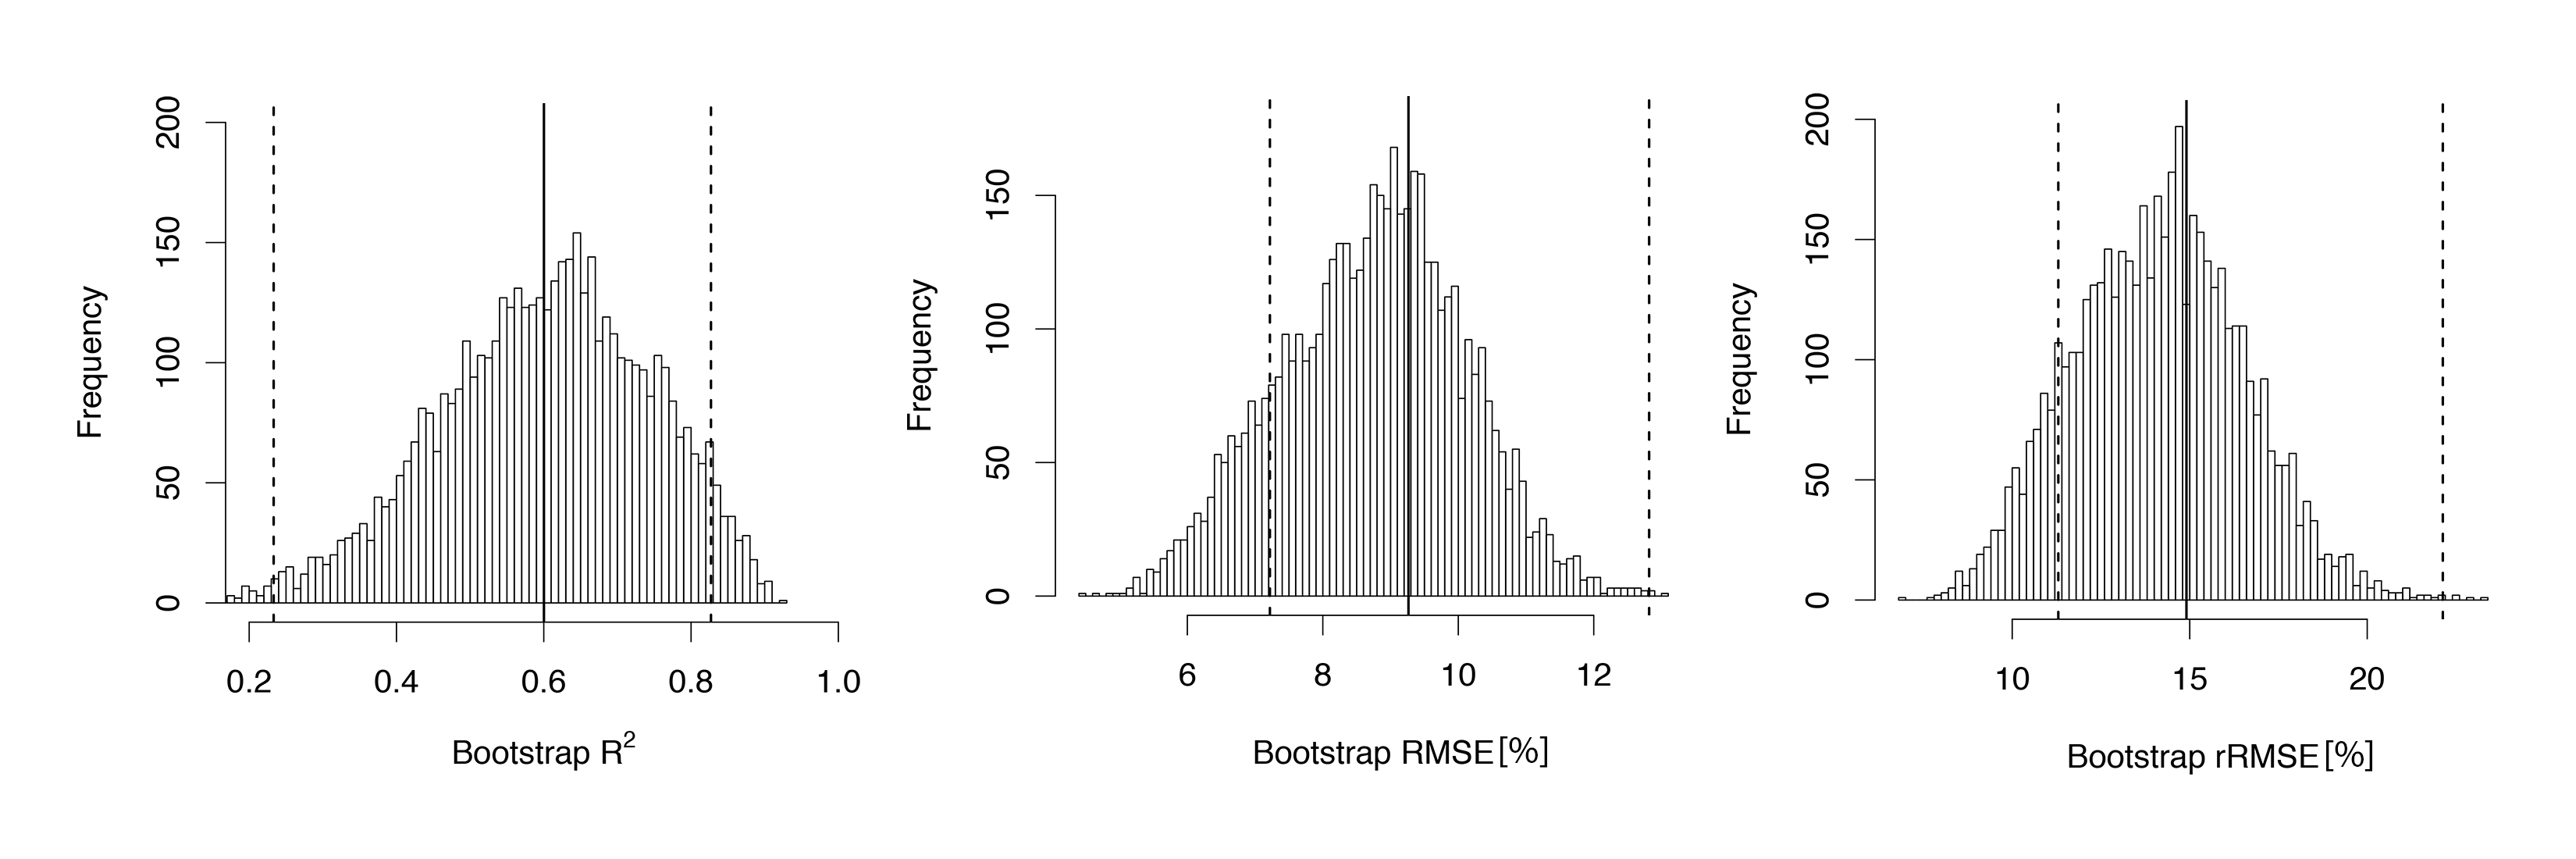


**Figure S2.** Histogram of R2, RMSE, and rRMSE as obtained from the bootstrapping for the best simple regression model to estimate canopy closure. The solid line represents the mean value, both dashed lines indicate he upper and lower bounds for the 95 percent confidence.


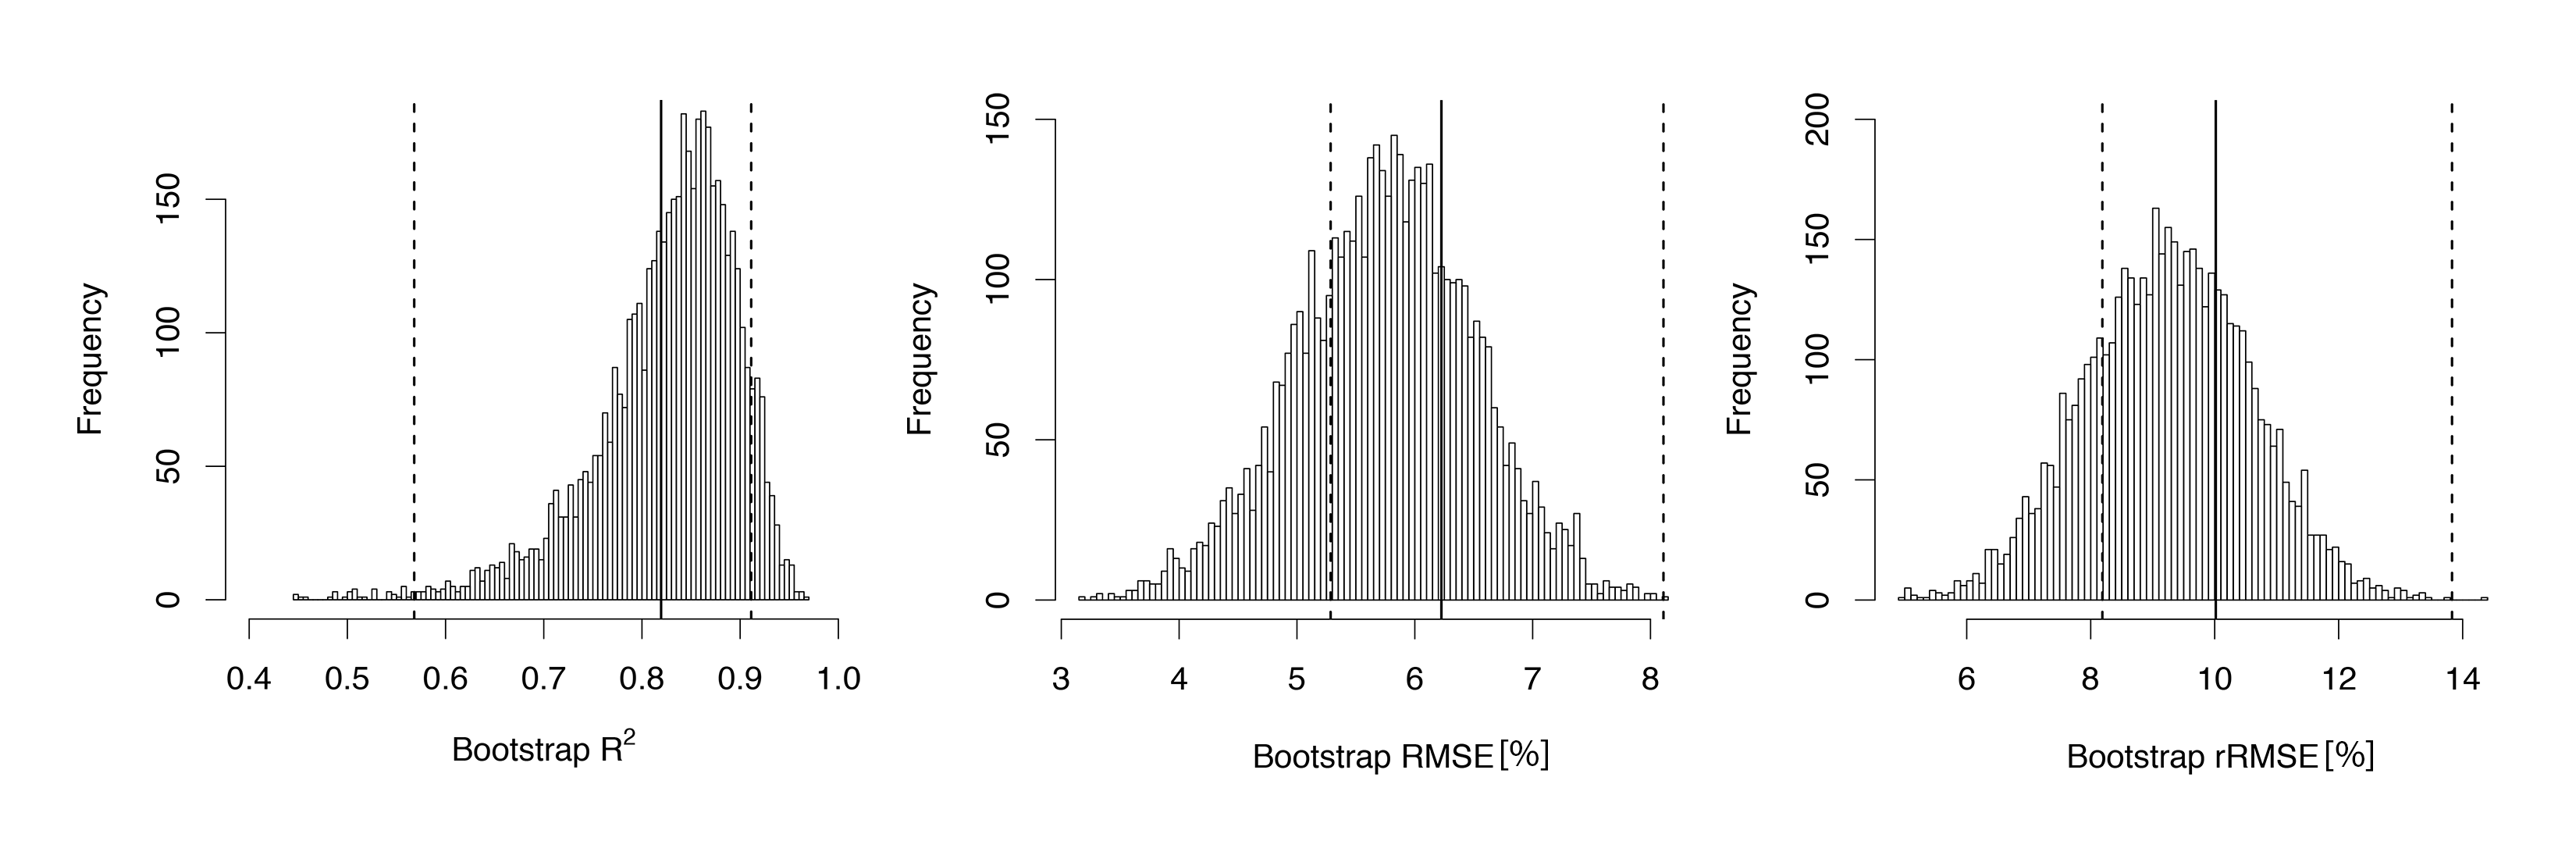


**Figure S3.** Histogram of R2, RMSE, and rRMSE as obtained from the bootstrapping for the best multiple regression model to estimate canopy closure. The solid line represents the mean value, both dashed lines indicate he upper and lower bounds for the 95 percent confidence.


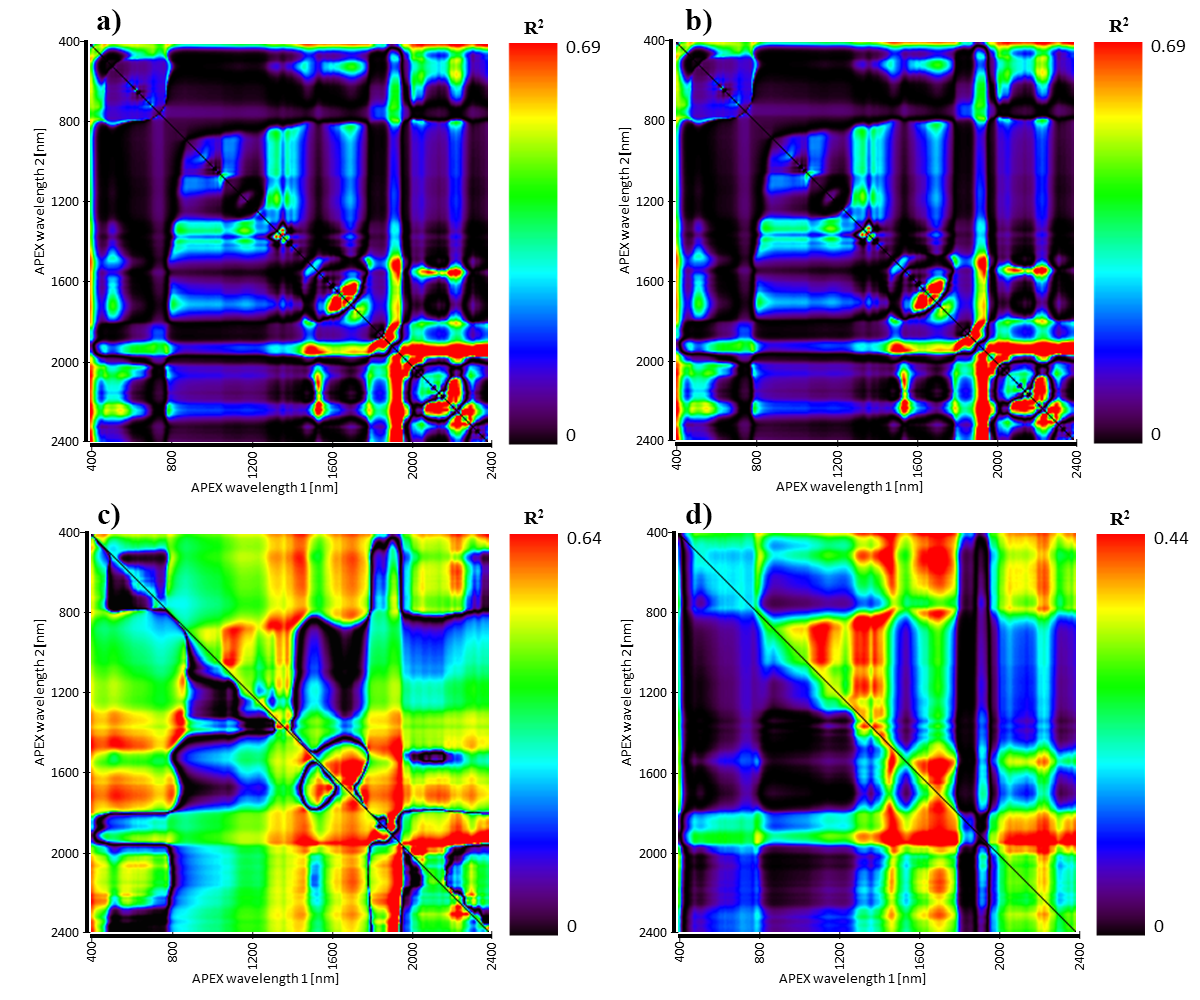


**Figure S4.** Correlograms showing the coefficients of determination (R2) between VIs for all two-band combinations and basal area. (a) simple ratio (SR) type; (b) NDVI type; (c) PVI type; (d) SAVI2 type.

Table S3. Best narrow-band VIs derived from 2D-correlograms to estimate basal area.

| Vegetation Index | ρ1(nm) | ρ2(nm) | R2 |
| --- | --- | --- | --- |
| SR Type | 1618 | 1724 | 0.58 |
| 2112 | 1993 | 0.51 |
| 2293 | 1993 | 0.53 |
| **2385** | **1993** | **0.63** |
| 1993 | 2300 | 0.50 |
| 1993 | 2385 | 0.61 |
| NDVI Type | 1618 | 1724 | 0.58 |
| 1993 | 2293 | 0.52 |
| 1993 | 2391 | 0.62 |
| PVI Type | 1993 | 2112 | 0.55 |
| 1993 | 2211 | 0.50 |
| SAVI2 Type | 1716 | 1993 | 0.42 |

**Table S4.** Bootstrap results for the best simple and the best stepwise multiple regression model to estimate basal area.

| **Feature** | **Bootstrap R2** | | **Bootstrap RMSE (m2/ha)** | | **Bootstrap rRMSE (%)** | |
| --- | --- | --- | --- | --- | --- | --- |
| Mean | SD | Mean | SD | Mean | SD |
| **Simple regression** | 0.60 | 0.11 | 9.51 | 1.34 | 22.88 | 3.28 |
| **Multiple regression** | 0.68 | 0.07 | 8.50 | 1.01 | 20.45 | 2.47 |


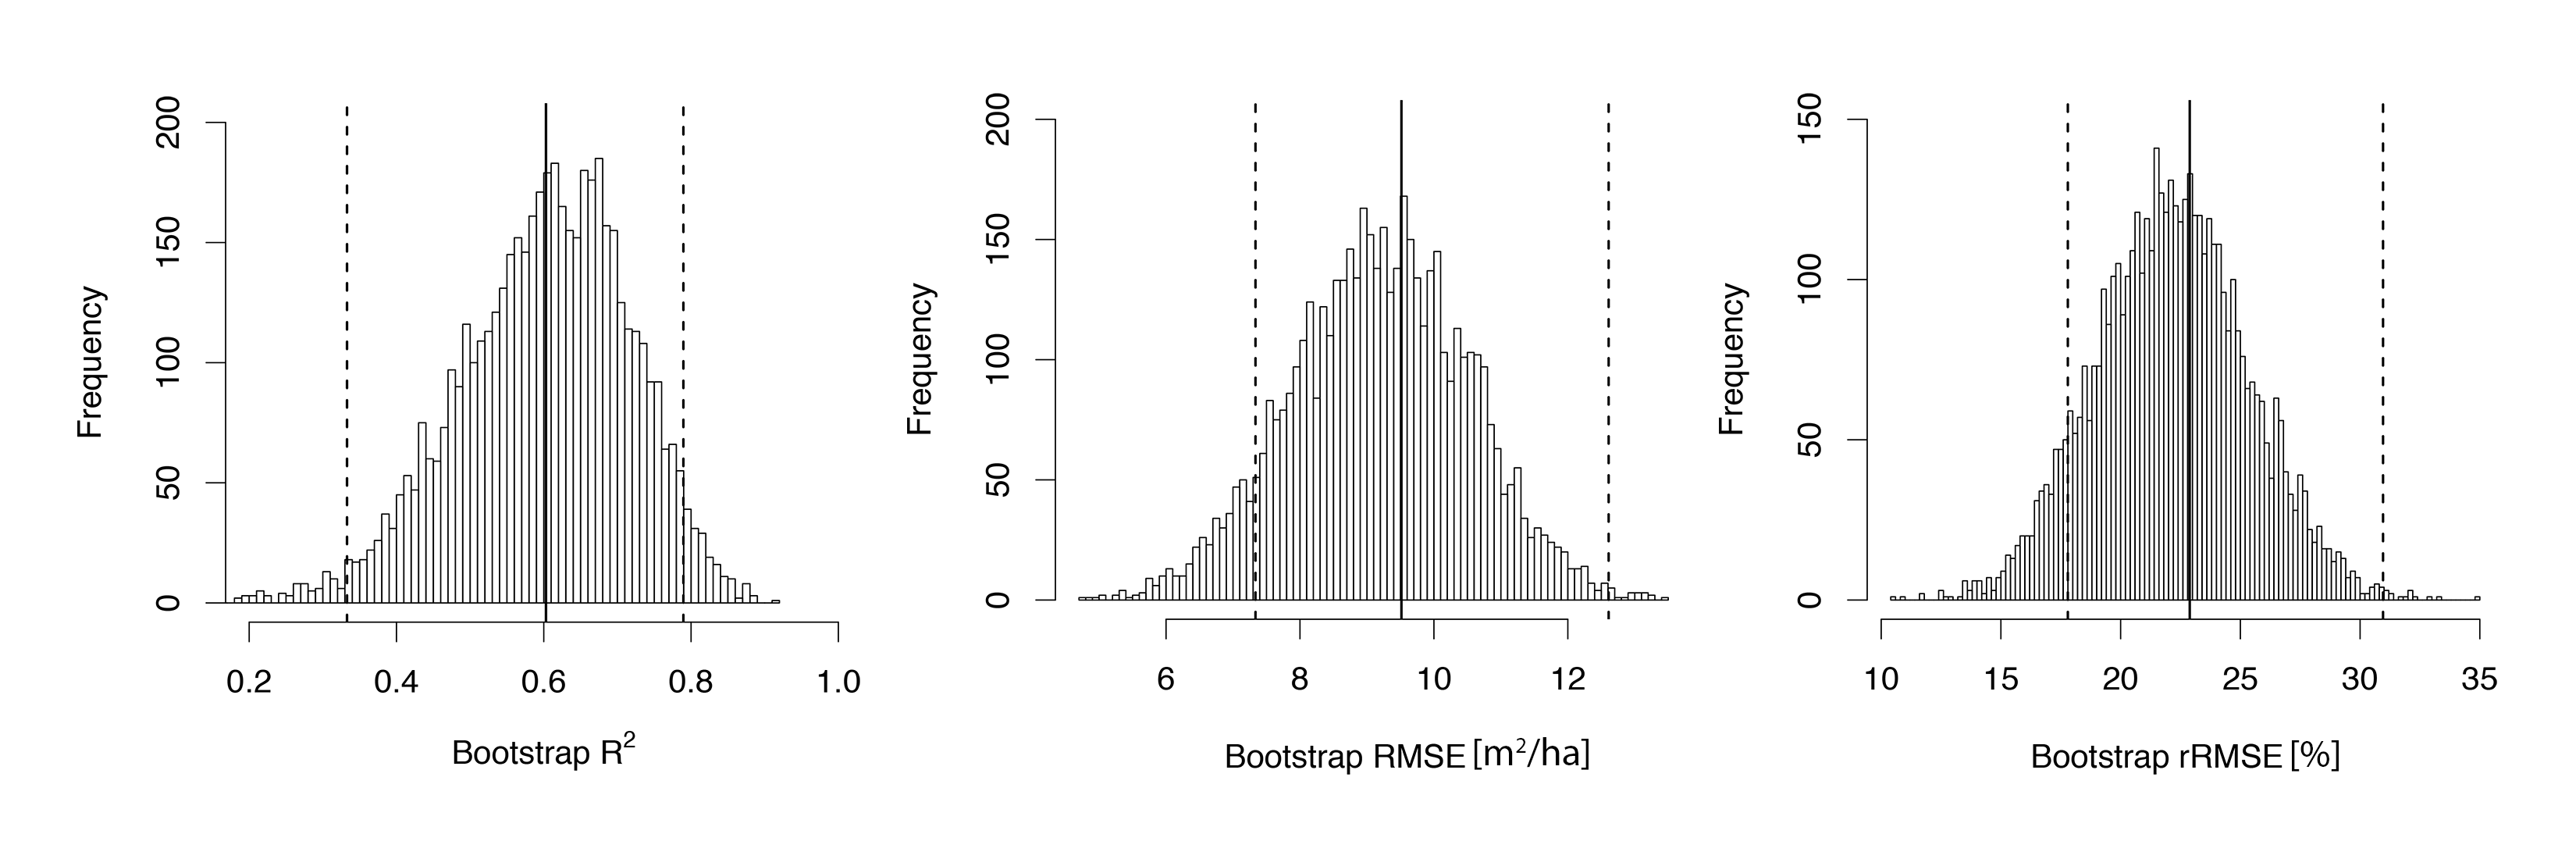


**Figure S5.** Histogram of R2, RMSE, and rRMSE as obtained from the bootstrapping for the best simple regression model to estimate basal area. The solid line represents the mean value, both dashed lines indicate he upper and lower bounds for the 95 percent confidence.


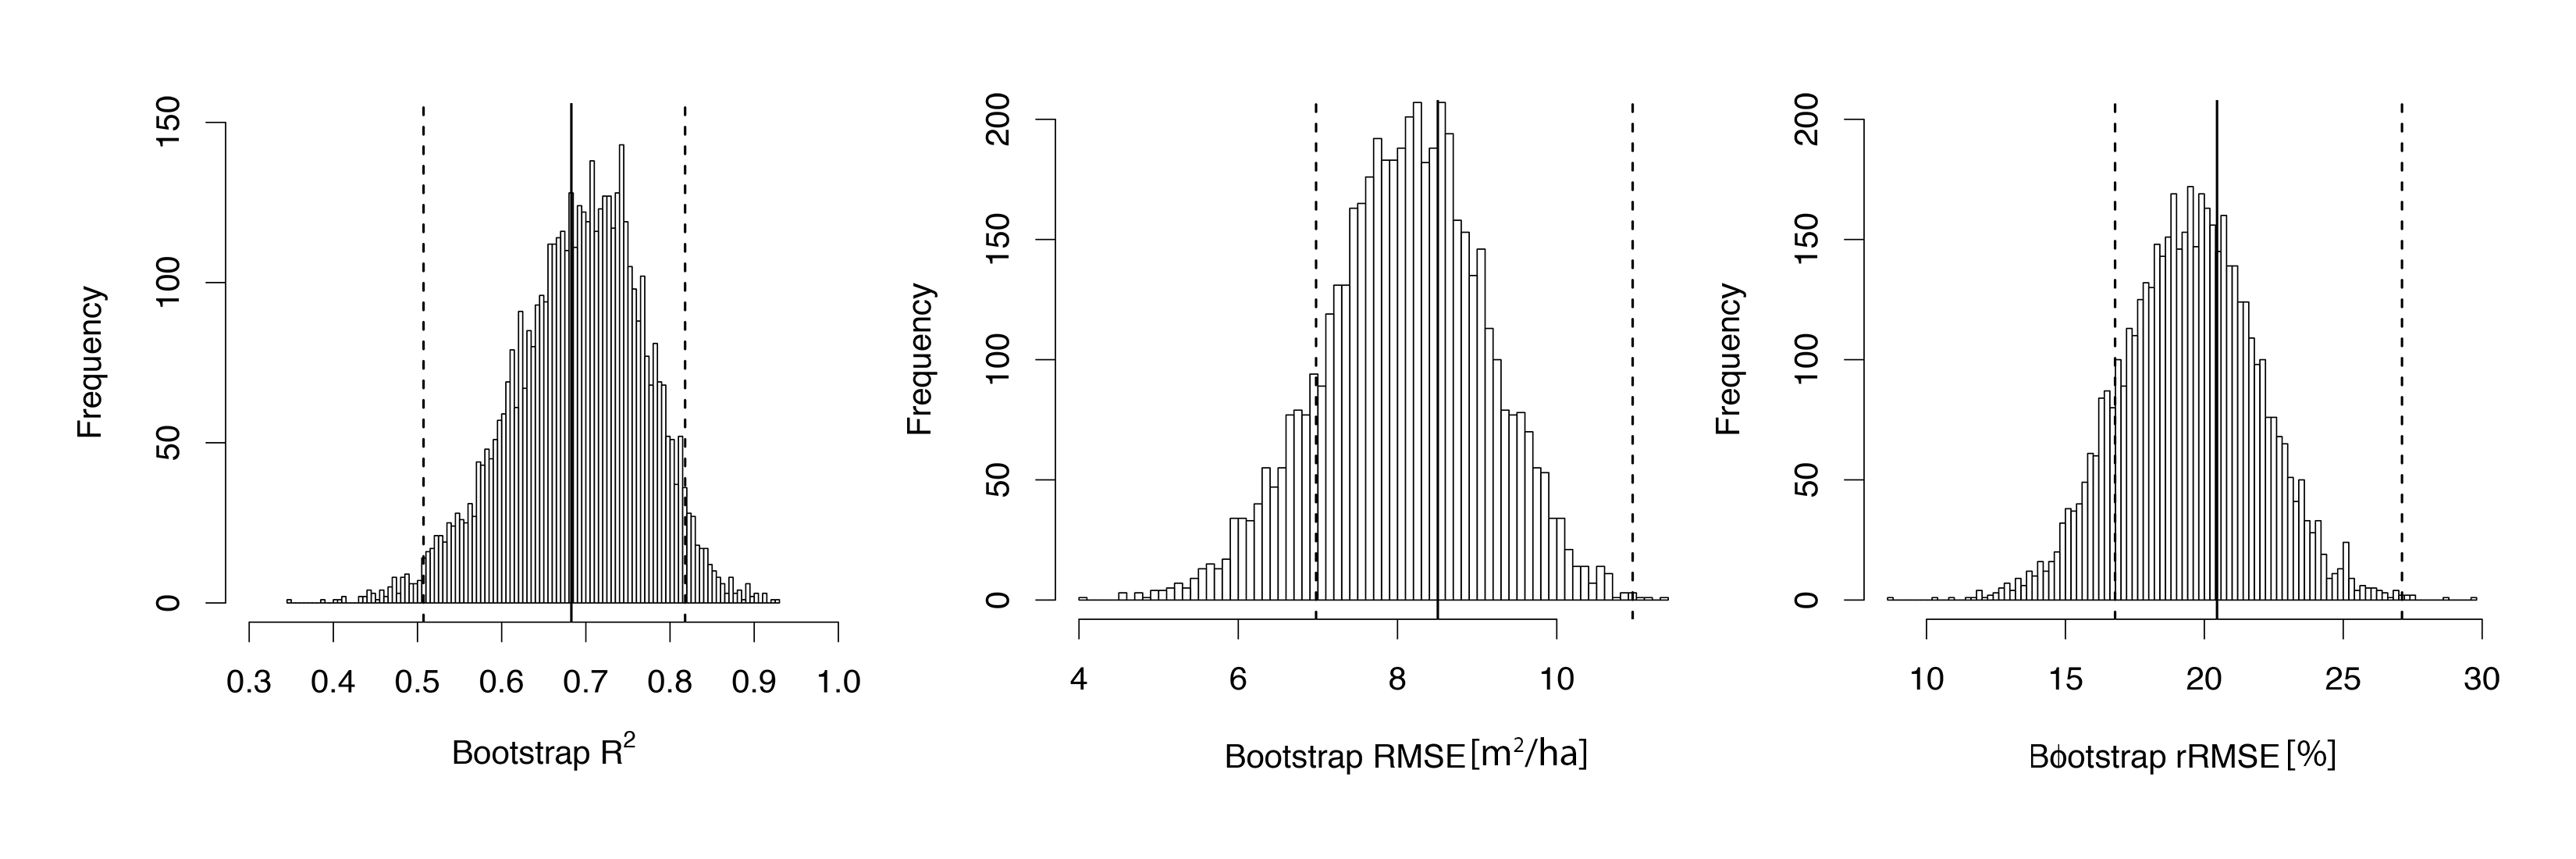


**Figure S6.** Histogram of R2, RMSE, and rRMSE as obtained from the bootstrapping for the best multiple regression model to estimate basal area. The solid line shows the mean value and the dashed lines show he upper and lower bounds for the 95 percent confidence.


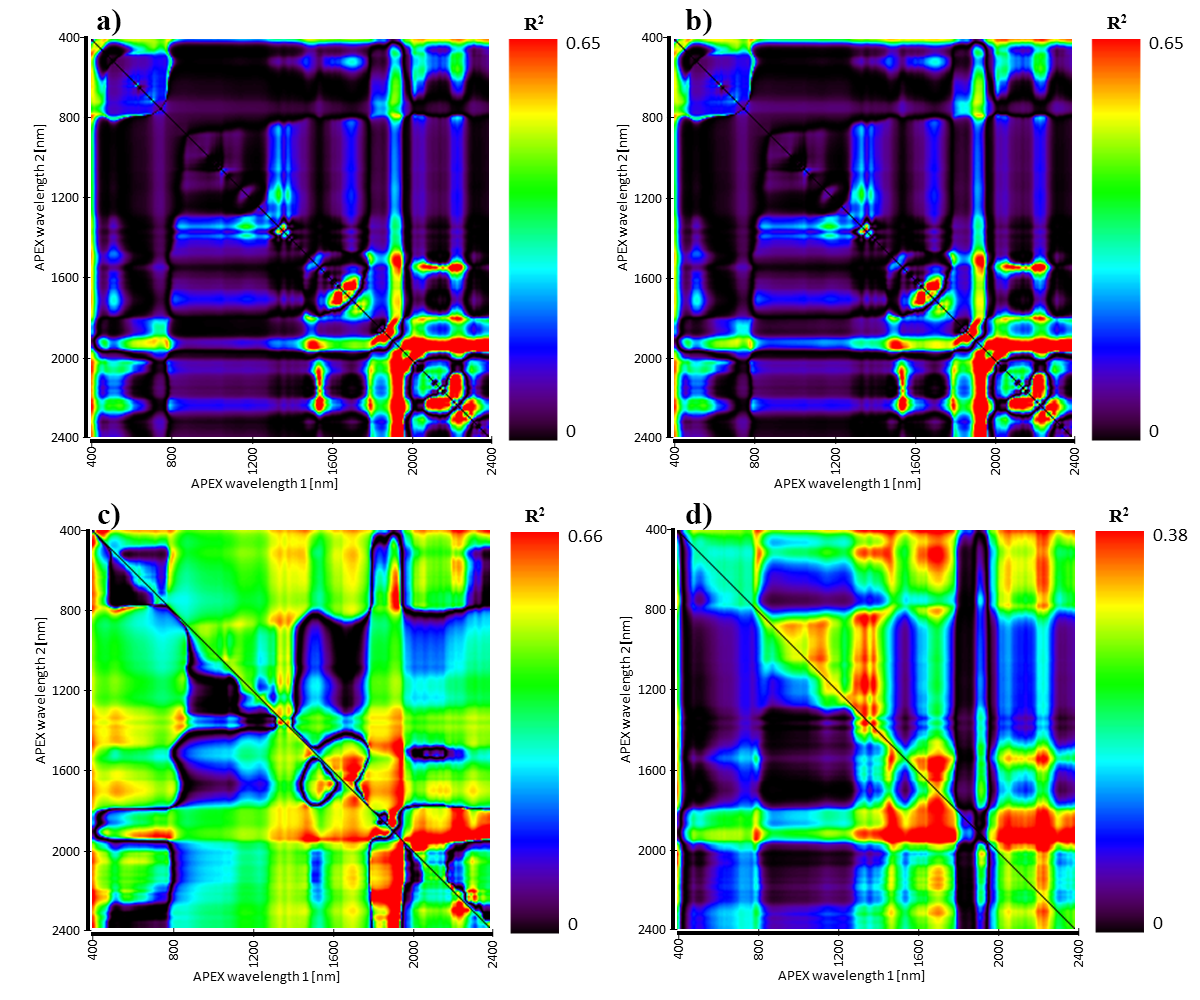


**Figure S7.** Correlograms showing the coefficients of determination (R2) between VIs for all two-band combinations and timber volume. (**a**) simple ratio (SR) type; (**b**) NDVI type; (**c**) PVI type; (**d**) SAVI2 type**.**

**Table S5.** Best narrow-band VIs derived from 2D-correlograms to estimate volume.

| Vegetation Index | ρ1(nm) | ρ2(nm) | R2 |
| --- | --- | --- | --- |
| SR Type | 2293 | 1993 | 0.54 |
| 2385 | 1993 | 0.61 |
| 1993 | 2105 | 0.53 |
| 1993 | 2300 | 0.55 |
| 1993 | 2385 | 0.61 |
| NDVI Type | 1993 | 2098 | 0.53 |
| 1993 | 2293 | 0.55 |
| 1993 | 2385 | 0.61 |
| PVI Type | 2105 | 2001 | 0.56 |
| **1993** | **2091** | **0.64** |
| 1993 | 2155 | 0.54 |
| SAVI2 Type | 2287 | 1993 | 0.38 |

**Table S6.** Bootstrap results for the best simple and the best stepwise multiple regression model to estimate timber volume.

| **Feature** | **Bootstrap R2** | | **Bootstrap RMSE (m3/ha)** | | **Bootstrap rRMSE (%)** | |
| --- | --- | --- | --- | --- | --- | --- |
| Mean | SD | Mean | SD | Mean | SD |
| **Simple Regression** | 0.68 | 0.10 | 101.04 | 11.91 | 24.29 | 3.42 |
| **Multiple Regression** | 0.72 | 0.07 | 93.11 | 8.77 | 22.38 | 2.53 |


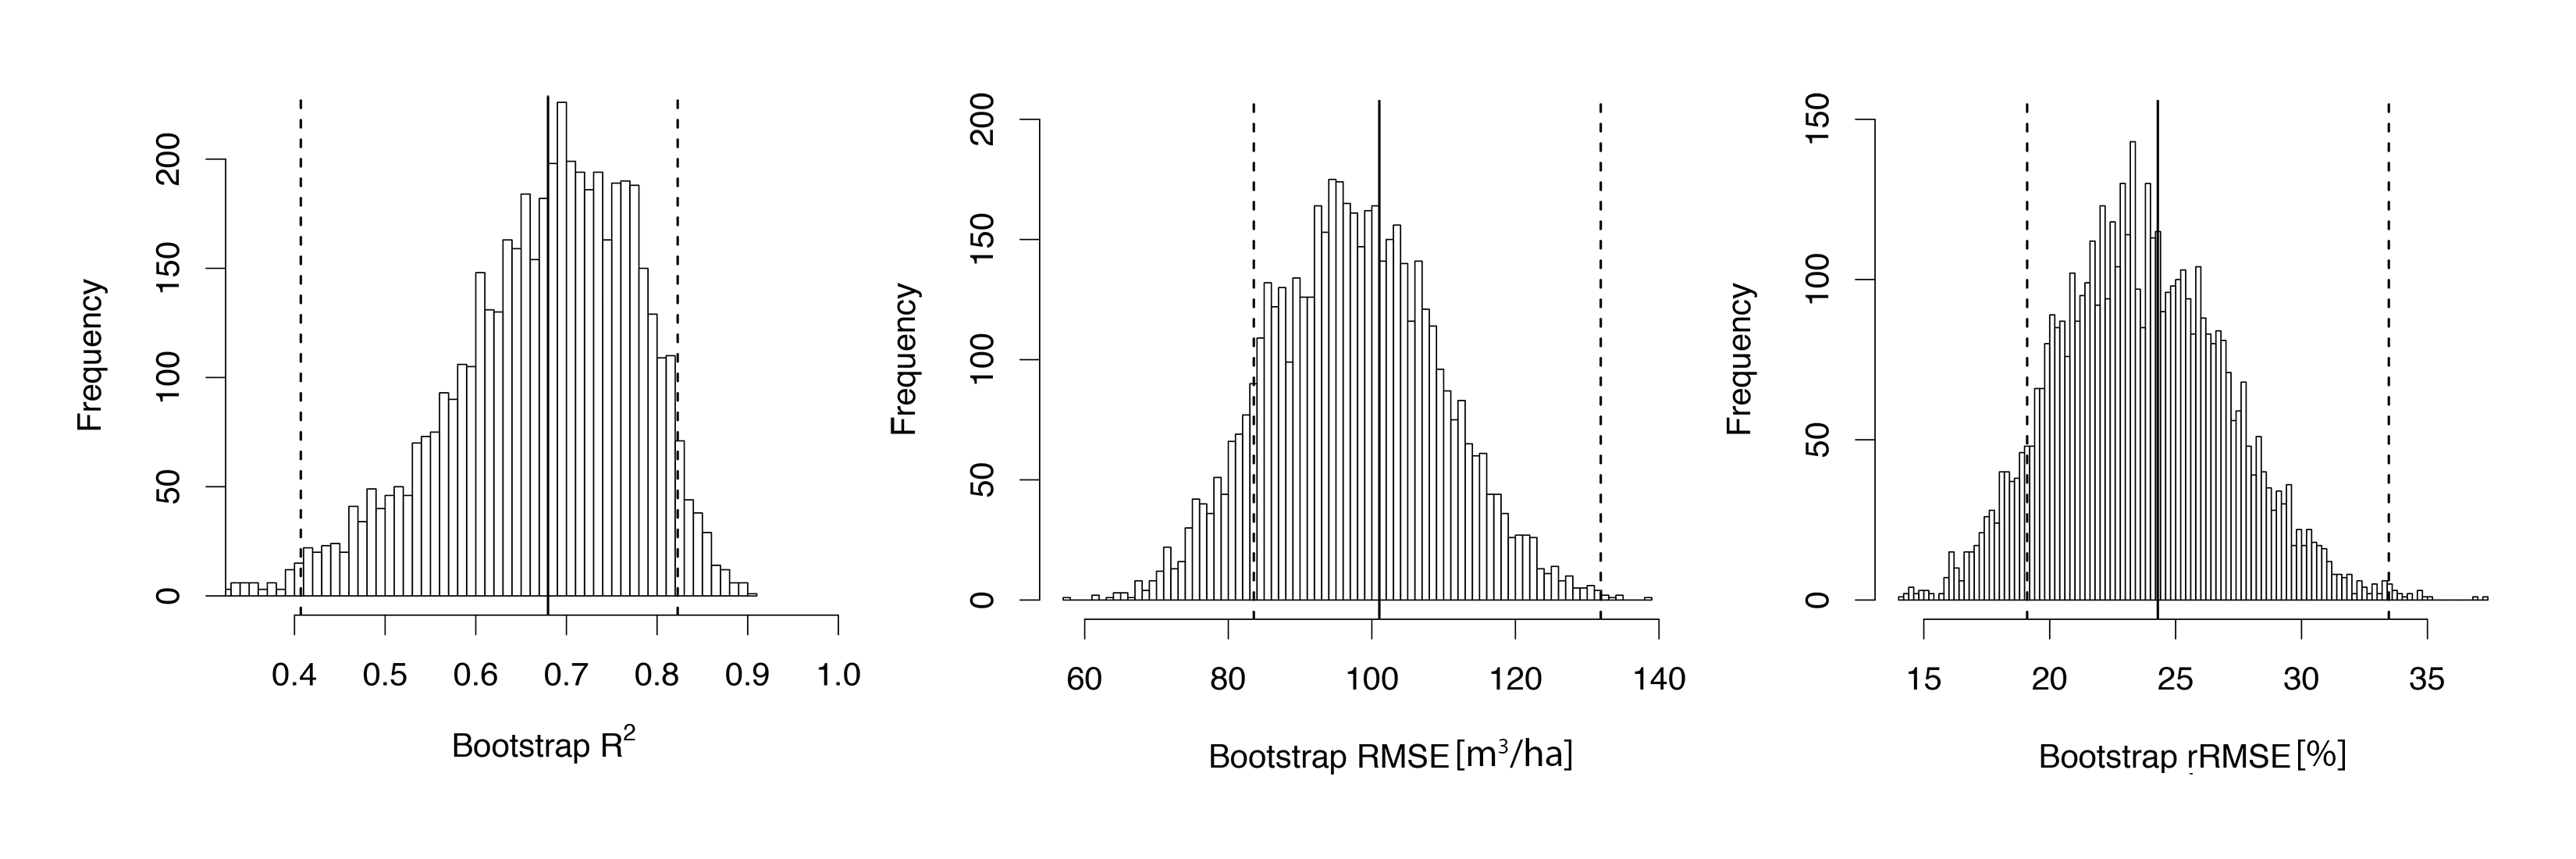


Figure S8. Histogram of R2, RMSE, and rRMSE as obtained from the bootstrapping for the best simple regression model to estimate timber volume. The solid line represents the mean value, both dashed lines indicate he upper and lower bounds for the 95 percent confidence.


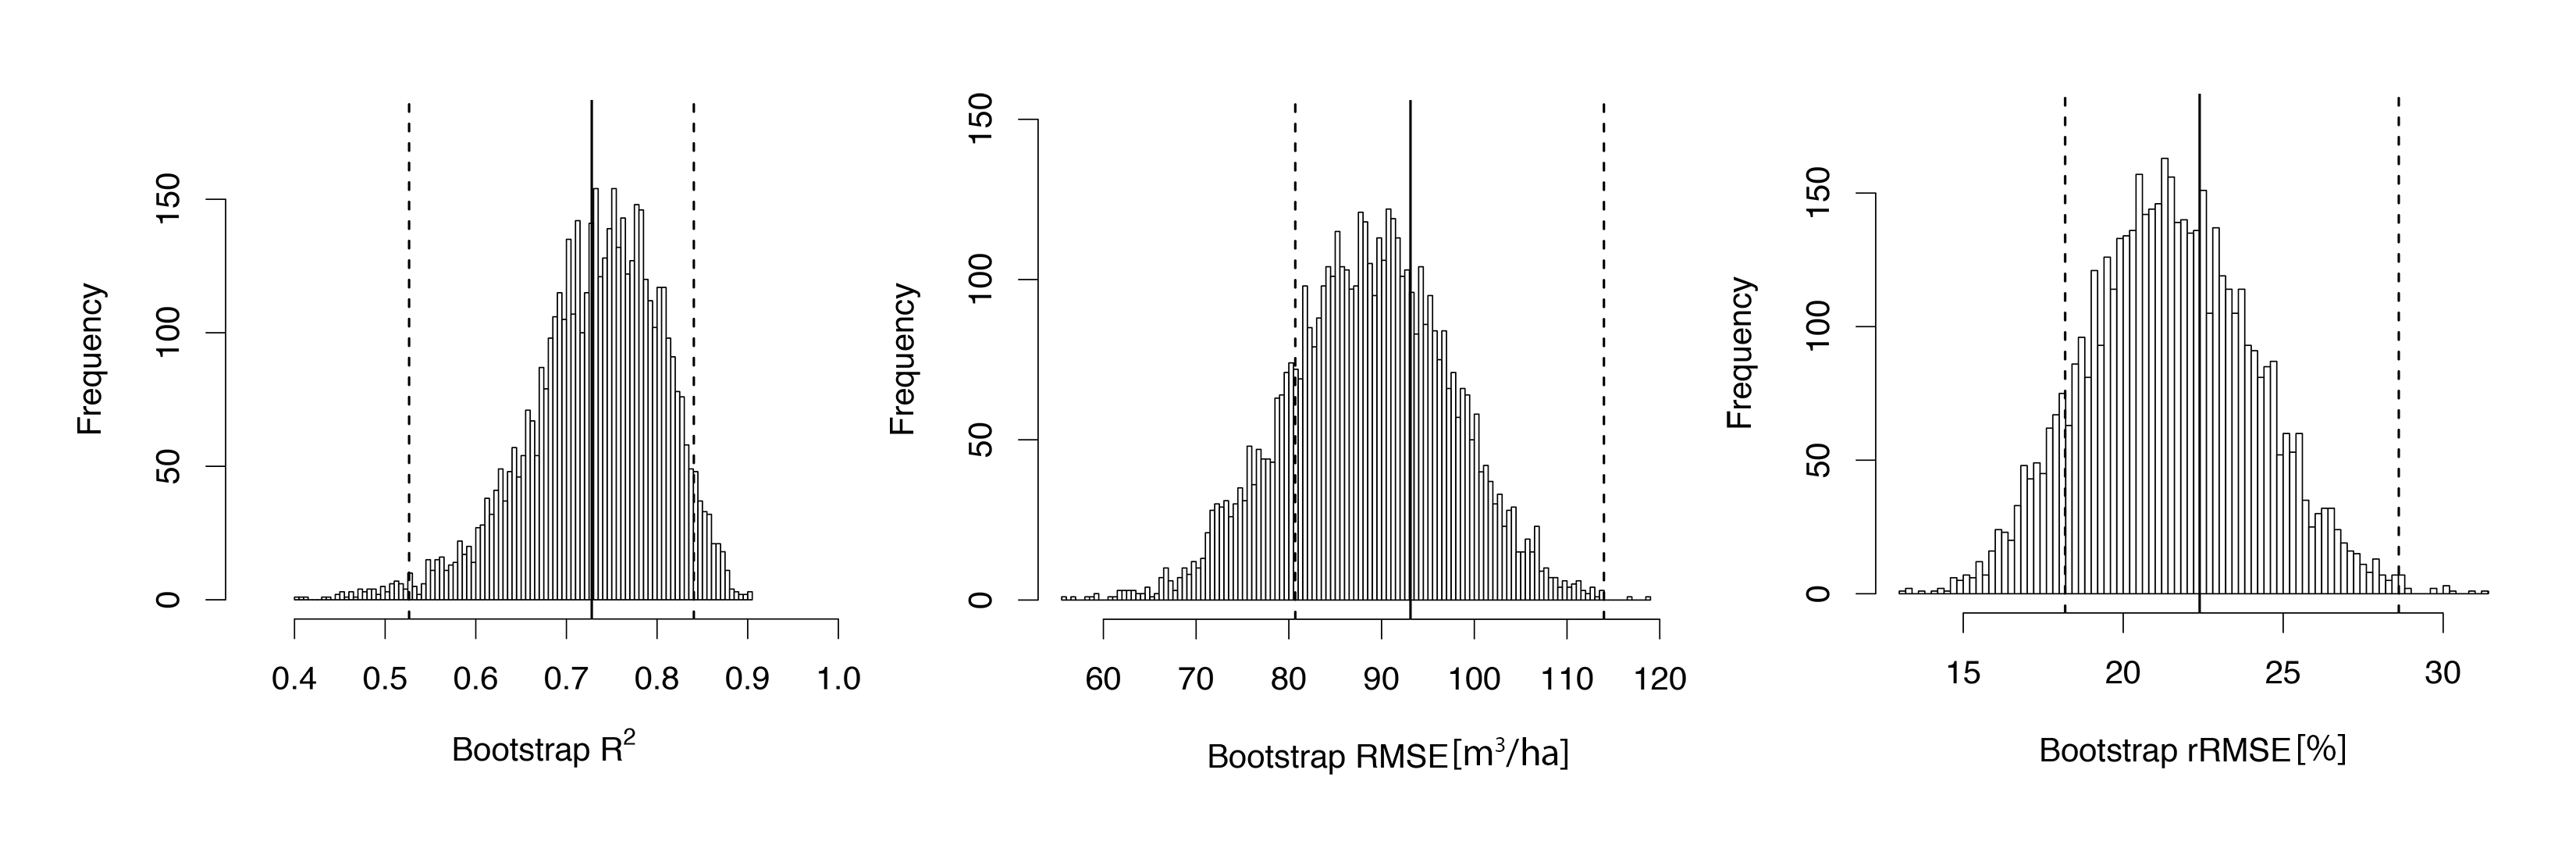


Figure S9. Histogram of R2, RMSE, and rRMSE as obtained from the bootstrapping for the best multiple regression model to estimate timber volume. The solid line represents the mean value, both dashed lines indicate he upper and lower bounds for the 95 percent confidence.

**Table S7.** Correlation between measured basal area, forest volume and canopy closure (N = number of field plots, ** = correlation is significant at the *0.01* level, Sig. = indicates the p-value to check for significance).

|  | | **Canopy Closure** | **Basal Area** | **Volume** |
| --- | --- | --- | --- | --- |
| Canopy Closure | Pearson Correlation | 1 | 0.741** | 0.627** |
| Sig. |  | 0.000 | 0.000 |
| N | 35 | 35 | 35 |
| Basal Area | Pearson Correlation | 0.**741**** | 1 | 0.946** |
| Sig. | 0.000 |  | 0.000 |
| N | 35 | 35 | 35 |
| Volume | Pearson Correlation | 0.**627**** | 0.**946**** | 1 |
| Sig. | 0.000 | 0.000 |  |
| N | 35 | 35 | 35 |

© 2015 by the authors; licensee MDPI, Basel, Switzerland. This article is an open access article distributed under the terms and conditions of the Creative Commons by Attribution (CC-BY) license (http://creativecommons.org/licenses/by/4.0/).
